# Supplementary material for: Epidemiological Surveillance of Lyme Borreliosis in Bavaria, Germany, 2013–2020
Source: MDPI journal article supplement (doi:10.3390/microorganisms9091872), 2021-09-03

## Supplement

Böhmer MM, Ens K, Böhm S, Heinzinger S, Fingerle V: **Epidemiological Surveillance of Lyme Borreliosis in Bavaria, Germany, 2013-2020**. Microorganisms 2021.

---

**Figure S1**

Annual incidence (reported cases per 100,000 inhabitants) of Lyme borreliosis in Bavaria, Germany, 2013 by age group and sex ( $n=5,414$  with information on age and sex available)

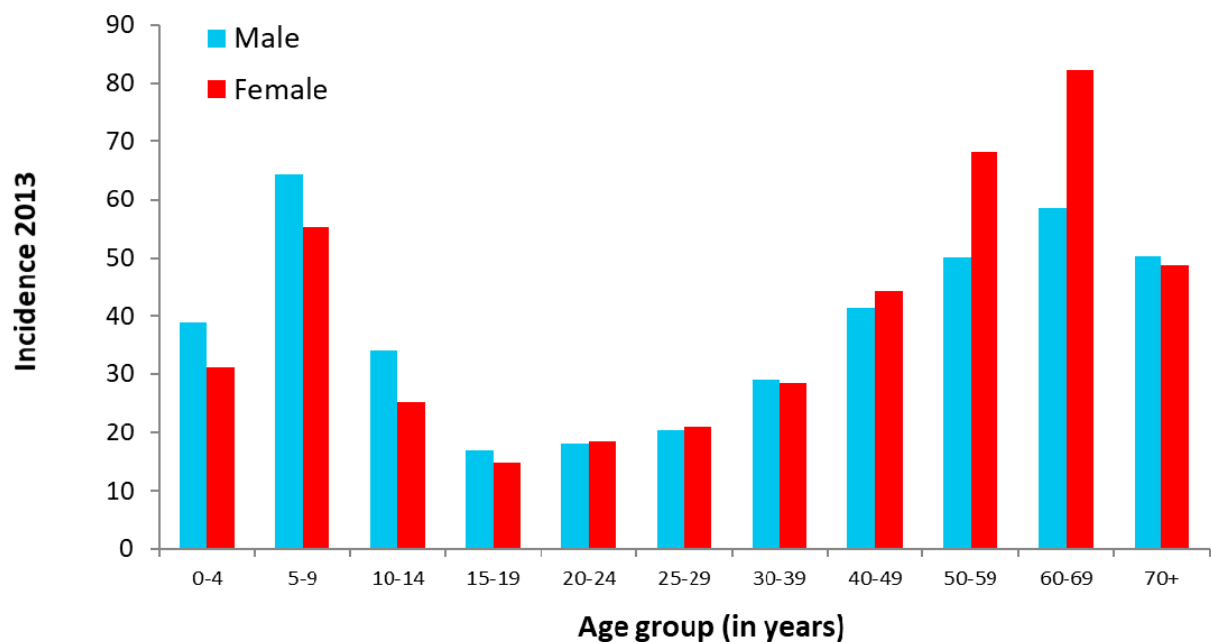

**Figure S2**

Annual incidence (reported cases per 100,000 inhabitants) of Lyme borreliosis in Bavaria, Germany, 2014 by age group and sex ( $n=3021$  with information on age and sex available)

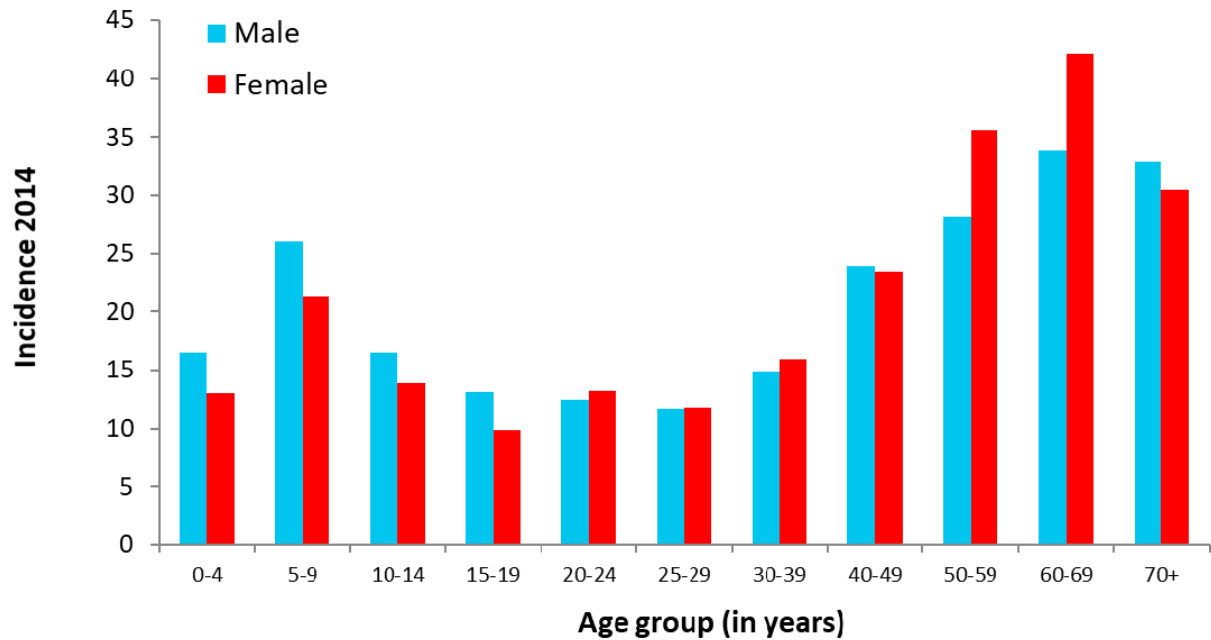

**Figure S3**

Annual incidence (reported cases per 100,000 inhabitants) of Lyme borreliosis in Bavaria, Germany, 2015 by age group and sex ( $n=2858$  with information on age and sex available)

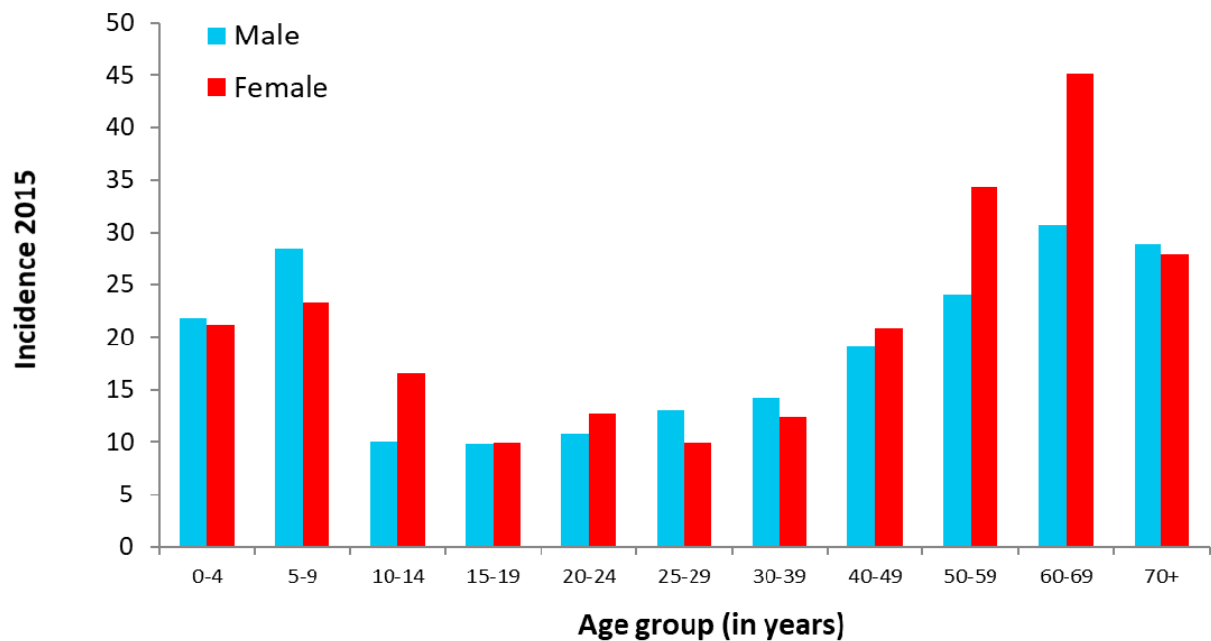

**Figure S4**

Annual incidence (reported cases per 100,000 inhabitants) of Lyme borreliosis in Bavaria, Germany, 2016 by age group and sex ( $n=4,443$  with information on age and sex available)

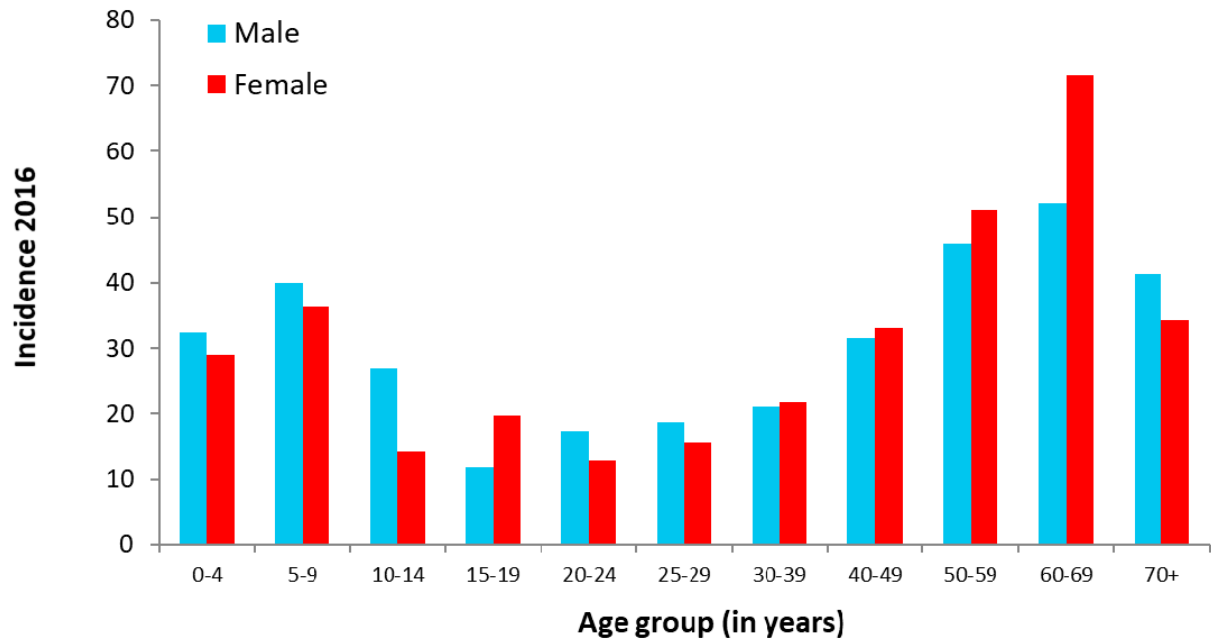

**Figure S5**

Annual incidence (reported cases per 100,000 inhabitants) of Lyme borreliosis in Bavaria, Germany, 2017 by age group and sex ( $n=3,394$  with information on age and sex available)

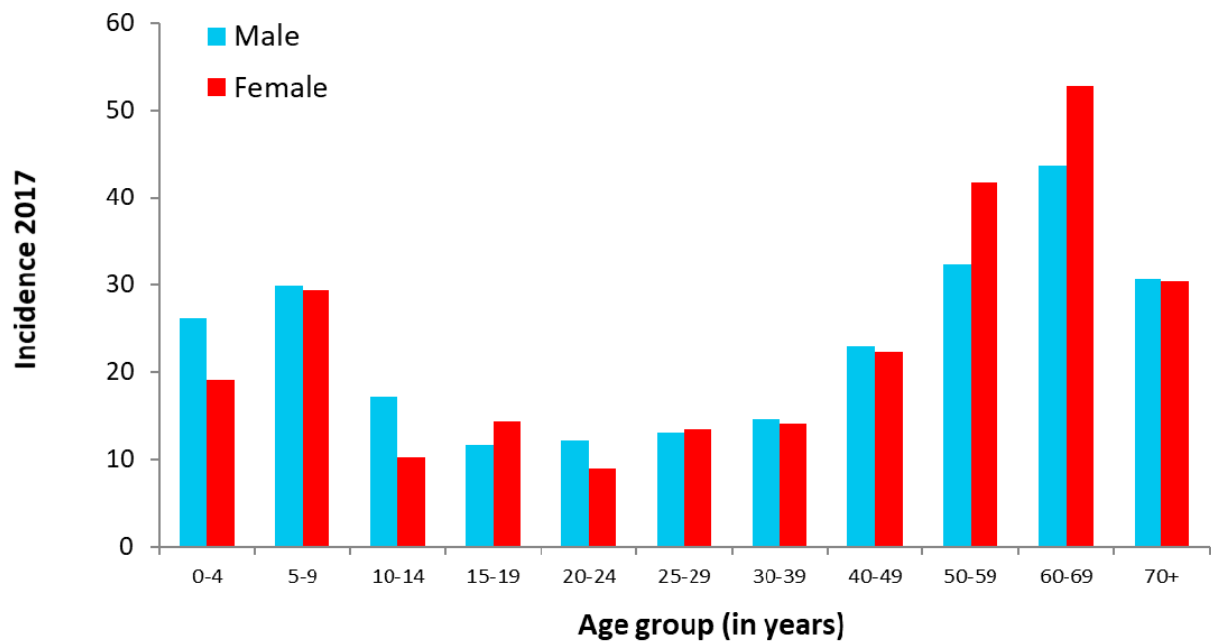

**Figure S6**

Annual incidence (reported cases per 100,000 inhabitants) of Lyme borreliosis in Bavaria, Germany, 2018 by age group and sex ( $n=4,797$  with information on age and sex available)

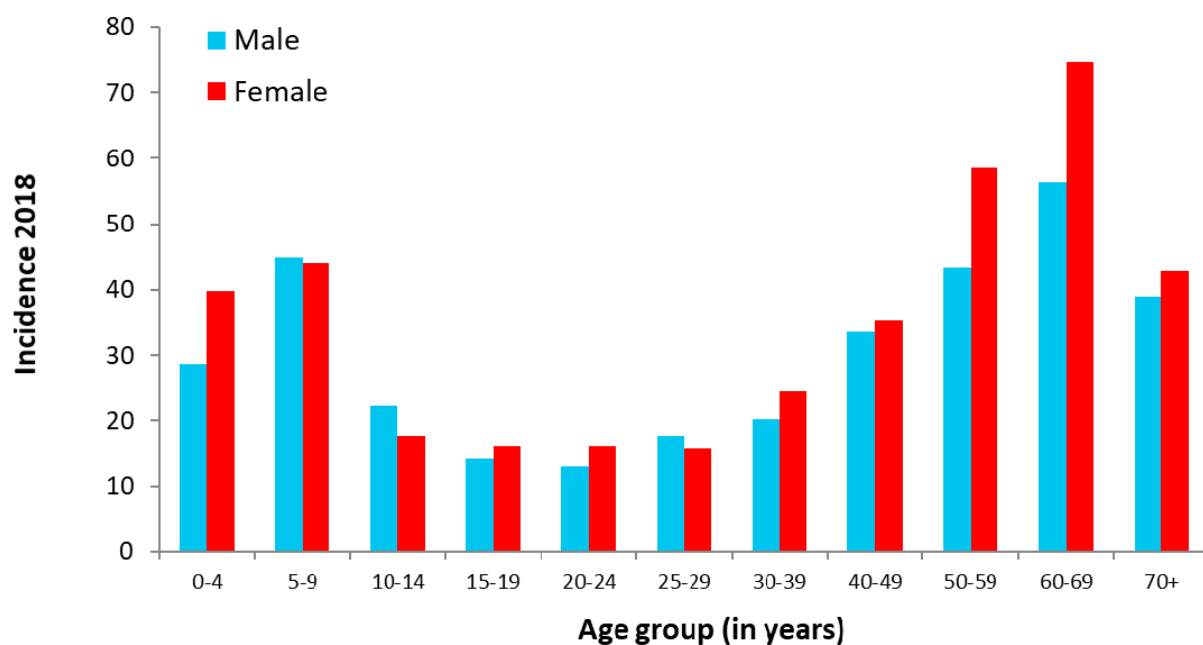

**Figure S7**

Annual incidence (reported cases per 100,000 inhabitants) of Lyme borreliosis in Bavaria, Germany, 2019 by age group and sex ( $n=4,068$  with information on age and sex available)

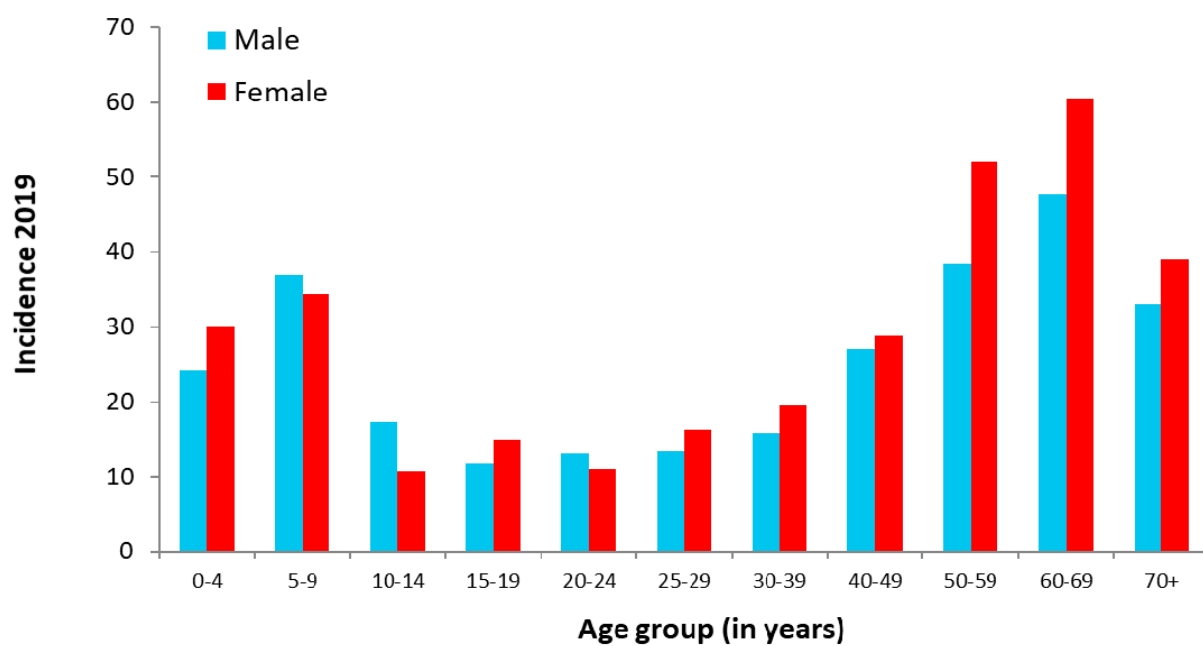

**Figure S8**

Annual incidence (reported cases per 100,000 inhabitants) of Lyme borreliosis in Bavaria, Germany, 2020 by age group and sex ( $n=6,007$  with information on age and sex available)

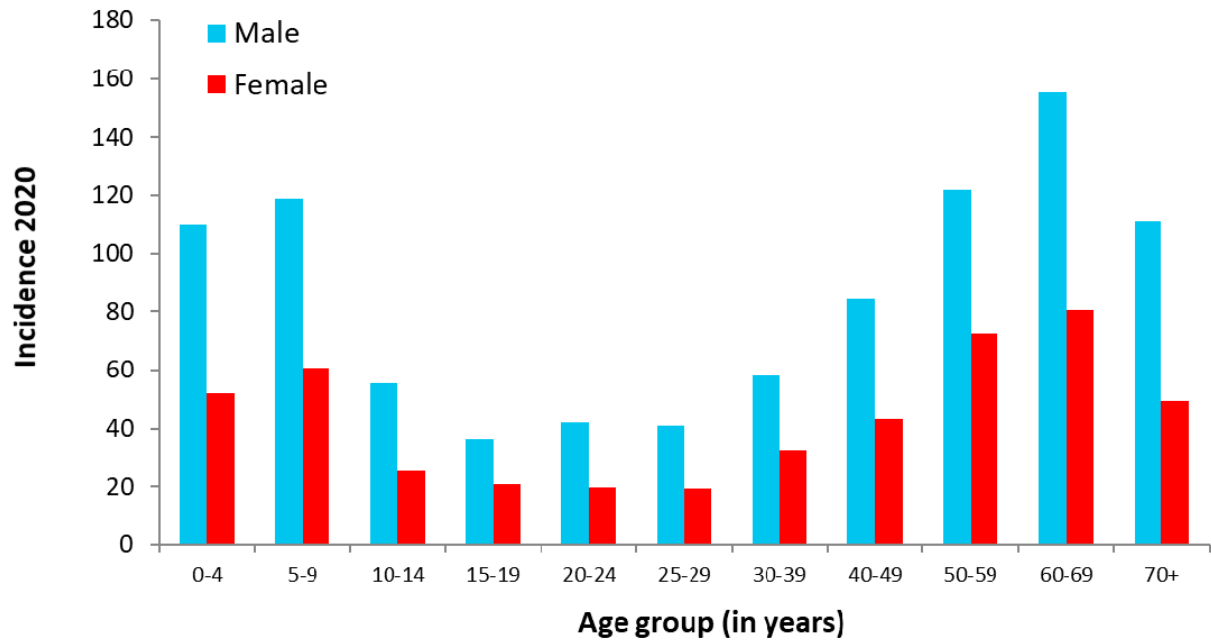

Supplement: s1 [file s1]
